# Supplementary material
Source: Springer Nature journal article supplement (https://www.springermedizin.de/resource/supplementary/12936_2014_3176_MOESM1_ESM.pdf/9545226)
Supplement: MOESM1 [file 9545226]

**Additional file 1. Association of malaria infection with age, sex, symptoms, interventions, geographical location and season<sup>iii</sup>**

| Category                                     | Passive Surveillance |                      |                              |                 | Active Surveillance |                      |                              |                 |
|----------------------------------------------|----------------------|----------------------|------------------------------|-----------------|---------------------|----------------------|------------------------------|-----------------|
|                                              | DP% <sup>a</sup>     | n/N <sup>b</sup> (I) | OR [95%CI] <sup>c</sup>      | P <sup>d</sup>  | DP% <sup>a</sup>    | n/N <sup>b</sup> (I) | OR [95%CI] <sup>c</sup>      | P <sup>d</sup>  |
| <i>Overall</i>                               | 42.50                | 2236/5261(3804)      | 0.74[0.68,0.79]              | <0.001          | 20.26               | 11851/58500 (17543)  | 0.25[0.23,0.27]              | <0.001          |
| <i>Age</i>                                   |                      |                      |                              |                 |                     |                      |                              |                 |
| <1                                           | 27.88                | 58/208 (145)         | 1.27[0.76,1.78]              | 0.352           | 12.82               | 204/1591 (635)       | 1.28[1.08,1.48]              | 0.015           |
| 1-4                                          | 42.11                | 480/1140 (768)       | 3.38[3.04,3.72]              | <0.001          | 22.47               | 2211/9841 (2797)     | 3.03[2.92,3.15]              | <0.001          |
| 5-10                                         | 59.10                | 799/1352 (935)       | 8.40[8.06,8.73]              | <0.001          | 26.40               | 3794/14369 (3920)    | 4.16[4.04,4.27]              | <0.001          |
| 11-14                                        | 53.55                | 294/549 (410)        | 7.05[6.68,7.43]              | <0.001          | 25.19               | 1813/7198 (2265)     | 3.97[3.85,4.09]              | <0.001          |
| 15-24                                        | 39.85                | 263/660 (510)        | 3.43[3.07,3.79]              | <0.001          | 18.84               | 1690/8969 (3031)     | 2.26[2.14,2.38]              | <0.001          |
| 25-44                                        | 27.32                | 244/893 (713)        | 1.81[1.46,2.17]              | 0.001           | 13.63               | 1470/10787 (3265)    | 1.36[1.25,1.48]              | <0.001          |
| 45                                           | 20.41                | 79/387 (323)         | 1[NA] <sup>e</sup>           | NA <sup>e</sup> | 11.70               | 617/5275 (1630)      | 1[NA] <sup>e</sup>           | NA <sup>e</sup> |
| <i>Sex</i>                                   |                      |                      |                              |                 |                     |                      |                              |                 |
| Male                                         | 44.32                | 1058/2387 (1699)     | 1[NA] <sup>e</sup>           | NA <sup>e</sup> | 21.92               | 5802/26475 (7703)    | 1[NA] <sup>e</sup>           | NA <sup>e</sup> |
| Female                                       | 40.99                | 1164/2840 (2042)     | 0.83[0.67,0.99]              | 0.019           | 18.74               | 5901/31481 (8285)    | 0.86[0.81,0.92]              | <0.001          |
| <i>Interventions</i>                         |                      |                      |                              |                 |                     |                      |                              |                 |
| ITN                                          | 39.02                | 1480/3793 (2738)     | 0.71[0.50,0.92]              | 0.002           | 17.14               | 7197/41978 (12295)   | 0.79[0.72,0.85]              | <0.001          |
| IRS                                          | 42.03                | 759/1806 (1224)      | 1.32[1.06,1.58]              | 0.036           | 15.39               | 2429/15788 (4323)    | 1.25[1.14,1.35]              | <0.001          |
| <i>Number of preceding tests<sup>f</sup></i> | 45.1 <sup>f</sup>    | 2236/5261(3804)      | 0.92[0.90,0.93] <sup>f</sup> | <0.001          | 30.7 <sup>f</sup>   | 11851/58500 (17543)  | 0.91[0.88,0.95] <sup>f</sup> | <0.001          |
| <i>Clusters</i>                              |                      |                      |                              |                 |                     |                      |                              |                 |
| <i>Luangwa district</i>                      |                      |                      |                              |                 |                     |                      |                              |                 |
| Sinyawagora RHC                              | 44.56                | 86/193 (178)         | 2.76[1.59,3.94]              | 0.090           | 23.23               | 809/3482 (1207)      | 1.75[0.96,2.54]              | 0.164           |
| Kasinsa RHC                                  | 33.95                | 184/542 (454)        | 4.46[3.43,5.49]              | 0.005           | 13.51               | 684/5063 (1243)      | 2.39[1.61,3.18]              | 0.030           |
| Chitope RHC                                  | 28.94                | 68/235 (179)         | 1.71[0.64,2.78]              | 0.325           | 17.58               | 1163/6614 (1030)     | 4.71[3.93,5.50]              | <0.001          |
| Luangwa High School RHC                      | 44.14                | 644/1459 (732)       | 1.93[0.94,2.91]              | 0.191           | 18.57               | 1342/7225 (999)      | 2.08[1.30,2.86]              | 0.066           |
| Mphuka RHC                                   | 39.10                | 217/555 (278)        | 2.79[1.72,3.87]              | 0.062           | 23.07               | 1249/5414 (1327)     | 1.59[0.81,2.37]              | 0.243           |

|                         |       |                  |                    |                 |       |                    |                    |                 |
|-------------------------|-------|------------------|--------------------|-----------------|-------|--------------------|--------------------|-----------------|
| Mandombe RHC            | 36.22 | 205/566 (469)    | 1.22[0.22,2.22]    | 0.695           | 9.69  | 606/6252 (1206)    | 1.14[0.37,1.92]    | 0.734           |
| Luangwa Boma RHC        | 22.03 | 39/177 (160)     | 1[NA] <sup>e</sup> | NA <sup>e</sup> | 5.90  | 368/6241 (1304)    | 1[NA] <sup>e</sup> | NA <sup>e</sup> |
| <i>Nyimba district</i>  |       |                  |                    |                 |       |                    |                    |                 |
| Kacholola RHC           | 42.34 | 94/222 (194)     | 10.76[9.62,11.91]  | <0.001          | 24.65 | 1198/4860 (1038)   | 6.87[6.09,7.66]    | <0.001          |
| Hofmeyer RHC            | 51.99 | 157/302 (280)    | 46.94[45.87,48.02] | <0.001          | 47.23 | 1050/2223 (1394)   | 13.25[12.46,14.04] | <0.001          |
| Mtilizi RHC             | 66.94 | 164/245(193)     | 11.34[10.23,12.46] | <0.001          | 36.51 | 782/2142 (847)     | 5.93[5.16,6.70]    | <0.001          |
| Mtilizi RHP             | 50.00 | 19/38 (37)       | 9.24[7.89,10.58]   | 0.001           | 22.72 | 573/2522 (1227)    | 5.08[4.36,5.80]    | <0.001          |
| Chinambi RHC            | 57.35 | 39/68 (59)       | 10.44[9.01,11.86]  | 0.001           | 29.11 | 560/1924 (947)     | 6.90[6.02,7.78]    | <0.001          |
| Mkopeka RHC             | 54.90 | 112/204 (179)    | 12.03[10.89,13.16] | <0.001          | 35.41 | 1004/2835 (753)    | 6.27[5.43,7.11]    | <0.001          |
| Chipembe RHC            | 45.71 | 208/455 (333)    | 7.56[6.50,8.61]    | <0.001          | 27.19 | 463/1703 (897)     | 5.89[5.07,6.71]    | <0.001          |
| <i>Season</i>           |       |                  |                    |                 |       |                    |                    |                 |
| Hot & wet (Dec – April) | 50.47 | 1082/2144 (1865) | 8.11[7.78,8.44]    | <0.001          | 20.79 | 4615/22195 (9843)  | 4.92[4.71,5.13]    | <0.001          |
| Cool & dry (May - Aug)  | 46.26 | 929/2008 (1749)  | 4.99[4.67,5.31]    | <0.001          | 25.38 | 6125/24137 (12025) | 4.00[4.71,5.13]    | <0.001          |
| Hot & dry (Sept – Nov)  | 24.72 | 224/906 (858)    | 1[NA] <sup>e</sup> | NA <sup>e</sup> | 9.05  | 1091/12056 (7745)  | 1[NA] <sup>e</sup> | NA <sup>e</sup> |

<sup>i</sup> a – Diagnostic positivity, b – (n – Number RDT positive, N – Total number of testing events ), I – number of individuals that participated , c – odds ratio with 95% confidence intervals, d – p-value ,NA<sup>e</sup> –Not applicable /reference group ,f – An integer continuous covariate so the diagnostic positivity presented represents that for the first visit calculated as the intercept of the model and the odds ratio presented represents proportional change of diagnostic positivity per additional preceding test.

<sup>ii</sup> The association of malaria infection with age, sex, symptoms, interventions, cluster, number of tests conducted per individual and season was determined using GLMM; with observed malaria RDT determined status as a binary dependent outcome with the independent categories of age, sex, symptoms, access and use of ITNs and/or IRS and seasons. The models included date and individual nested within CHW catchment nested within cluster as random effects except for one in which cluster was treated as a categorical variable to determine the effects of each cluster . Symptoms were removed from the final model for logical reasons, as they are effects and not causes of infection. The final model consisted of age, sex, access and use of ITNs and/or IRS, season, number of tests conducted per individual and geographical location as the determinants of malaria infection.
